# Supplementary material for: MicroRNA-5572 Is a Novel MicroRNA-Regulating SLC30A3 in Sporadic Amyotrophic Lateral Sclerosis
Source: PubMed Central journal article supplement (PMC7350020; doi:10.3390/ijms21124482), 2020-06-24
Supplement: ijms-21-04482-s001.pdf [file ijms-21-04482-s001.pdf]

Supplemental Table 1. Up-regulated miRNA in ALS

| Expression value {ALS} | Expression value {Control} | Ratio     | Log2Ratio | Transcript ID(Array Design) | Alignments                                             | Sequence                 |
|------------------------|----------------------------|-----------|-----------|-----------------------------|--------------------------------------------------------|--------------------------|
| 1464.853               | 180.954                    | 8.0951678 | 3.017061  | hsa-miR-206                 | chr6:52009199-52009220 (+)                             | UGGAAUGUAAGGAAGUGUGUGG   |
| 147.059                | 30.19697                   | 4.8699919 | 2.2839194 | hsa-miR-133b                | chr6:52013786-52013807 (+)                             | UUUGGUCCCCUUAACCAAGCUA   |
| 50.76917               | 13.39411                   | 3.7904101 | 1.922354  | hsa-miR-10a-3p              | chr17:46657226-46657247 (-)                            | CAAUUUCGUUUCUAGGGGAAUA   |
| 25.39761               | 7.049512                   | 3.6027473 | 1.8490974 | hsa-miR-183-3p              | chr7:129414768-129414789 (-)                           | GUGAAUUACCGAAGGGCCAUAA   |
| 19.06265               | 5.306083                   | 3.5926031 | 1.8450295 | hsa-miR-340-5p              | chr5:179442361-179442382 (-)                           | UUUAAAAGCAAUGAGACUGAUU   |
| 13.24187               | 3.909132                   | 3.3874195 | 1.7601867 | hsa-miR-95-3p               | chr4:8007039-8007060 (-)                               | UUCAACGGGUUUUUUUGAGCA    |
| 6.429382               | 1.911846                   | 3.3629184 | 1.7497138 | hsa-miR-502-5p              | chrX:49779221-49779241 (+)                             | AUCCUUGCUAUCUGGGUGCUA    |
| 6.978383               | 2.075337                   | 3.36253   | 1.7495472 | hsa-miR-216a-5p             | chr2:56216155-56216176 (-)                             | UAAUCUCAGCUGGCAACUGUGA   |
| 278.0903               | 88.29298                   | 3.1496309 | 1.6551828 | hsa-miR-133a-3p             | chr18:19405673-19405694 (-) // chr20:61162177-61162198 | UUUGGUCCCCUUAACCAAGCUG   |
| 44.49857               | 14.47254                   | 3.0746897 | 1.6204408 | hsa-miR-216b-5p             | chr2:56227899-56227920 (-)                             | AAAUCUCUGCAGGCAAAUGUGA   |
| 26.23337               | 9.924257                   | 2.6433586 | 1.4023722 | hsa-miR-3607-5p             | chr5:85916325-85916346 (+)                             | GCAUGUGAUGAAGCAAUCAGU    |
| 28.36707               | 10.97481                   | 2.5847436 | 1.3700212 | hsa-miR-200b-3p             | chr1:1102540-1102561 (+)                               | UAAUACUGCCUGGUAAUGAUGA   |
| 11.42488               | 4.437901                   | 2.5743882 | 1.3642296 | hsa-miR-103a-2-5p           | chr20:3898151-3898173 (+)                              | AGCUUCUUUACAGUGCUGCCUUG  |
| 622.1795               | 245.616                    | 2.5331391 | 1.3409263 | hsa-miR-122-5p              | chr18:56118320-56118341 (+)                            | UGGAGUGUGACAAUGGUGUUUG   |
| 168.2702               | 66.77013                   | 2.5201419 | 1.3335049 | hsa-miR-223-3p              | chrX:65238779-65238800 (+)                             | UGUCAGUUUGUCAAAUACCCCA   |
| 8.818762               | 3.533532                   | 2.4957357 | 1.3194652 | hsa-miR-4419a               | chr1:23384373-23384389 (-)                             | UGAGGGAGGAGACUGCA        |
| 15.44541               | 6.207881                   | 2.4880326 | 1.3150054 | hsa-miR-224-5p              | chrX:151127103-151127123 (-)                           | CAAGUCACUAGUGGUUCCGUU    |
| 360.2406               | 146.262                    | 2.4629815 | 1.3004058 | hsa-miR-183-5p              | chr7:129414807-129414828 (-)                           | UAUGGCACUGGUAGAAUUCACU   |
| 28.517                 | 11.74655                   | 2.4276915 | 1.2795851 | hsa-miR-410-3p              | chr14:101532298-101532318 (+)                          | AAUUAACACAGAUGGCCUGU     |
| 37.57158               | 15.83509                   | 2.3726787 | 1.2465167 | hsa-miR-5572                | chr15:80873520-80873540 (+)                            | GUUGGGGUGCAGGGGUCUGCU    |
| 14.72862               | 6.233734                   | 2.3627283 | 1.2404538 | hsa-miR-193a-3p             | chr17:29887069-29887090 (+)                            | AACUGGCCUACAAAGUCCAGU    |
| 1621.209               | 696.3143                   | 2.3282719 | 1.2192595 | hsa-miR-451a                | chr17:27188421-27188442 (-)                            | AAACCGUUACCAUACUGAGUU    |
| 28.15777               | 12.23685                   | 2.3010636 | 1.2023009 | hsa-miR-326                 | chr11:75046152-75046171 (-)                            | CCUCUGGGCCUUCUCCAG       |
| 49.12244               | 21.73684                   | 2.2598703 | 1.17624   | hsa-miR-3605-3p             | chr1:33798006-33798028 (-)                             | CCUCCGUGUUACCUUGCCUAG    |
| 38.72617               | 17.44977                   | 2.219294  | 1.1501008 | hsa-miR-335-5p              | chr7:130135967-130135989 (+)                           | UCAAGAGCAAUACGAAAAAUGU   |
| 8.667975               | 3.916714                   | 2.2130733 | 1.1460512 | hsa-miR-513c-5p             | chrX:146271271-146271292 (-)                           | UUCUCAAGGAGGUGUCGUUUUAU  |
| 65.6864                | 29.75305                   | 2.2077199 | 1.1425571 | hsa-miR-500b-3p             | chrX:49775330-49775349 (+)                             | GCACCCAGGCAAGGAUUCUG     |
| 48.16438               | 22.34892                   | 2.15511   | 1.1077615 | hsa-miR-454-3p              | chr17:57215148-57215170 (-)                            | UAGUGCAAUUAUUGCUUAUAGGGU |
| 5.791406               | 2.700037                   | 2.1449358 | 1.1009345 | hsa-miR-369-5p              | chr14:101531943-101531964 (+)                          | AGAUCGACCGUGUUUAUUCGC    |
| 169.9535               | 80.70351                   | 2.1058997 | 1.0744367 | hsa-miR-374b-5p             | chrX:73438422-73438443 (-)                             | AUAUAAUACAACCUUGCUAAGUG  |
| 201.6522               | 98.00868                   | 2.0574933 | 1.0408877 | hsa-miR-26b-5p              | chr2:219267380-219267400 (+)                           | UUCAAGUAAUUCAGGAUAGGU    |
| 107.9958               | 52.58881                   | 2.053589  | 1.0381475 | hsa-miR-338-3p              | chr17:79099687-79099708 (-)                            | UCCAGCAUCAGUAAUUUGUUG    |
| 8.147333               | 3.980638                   | 2.0467405 | 1.0333282 | hsa-miR-199b-5p             | chr9:131007062-131007084 (-)                           | CCCAGUGUUUAGACUAUCUGUUC  |
| 15.73682               | 7.688725                   | 2.0467399 | 1.0333278 | hsa-miR-6875-5p             | chr7:100465663-100465683 (+)                           | UGAGGGACCCAGGACAGGAGA    |
| 24.58124               | 12.11218                   | 2.0294646 | 1.0210991 | hsa-miR-4800-5p             | chr4:2251854-2251874 (-)                               | AGUGGACCGAGGAAGGAAGGA    |
| 8.735964               | 4.328875                   | 2.018068  | 1.0129748 | hsa-miR-6721-5p             | chr6:32137861-32137883 (-)                             | UGGGCAGGGCUAAUUGUAGGAG   |
| 11.92312               | 5.9554                     | 2.0020687 | 1.0014915 | hsa-miR-6076                | chr14:50433117-50433137 (+)                            | AGCAUGACAGAGGAGAGGUGG    |

Supplemental Table 2. Down-regulated miRNA in ALS

| Expression value {ALS} | Expression value {Control} | Ratio       | Log2Ratio    | Transcript ID(Array Design) | Alignments                                                                       | Sequence                  |
|------------------------|----------------------------|-------------|--------------|-----------------------------|----------------------------------------------------------------------------------|---------------------------|
| 144.7387               | 299.3523                   | 0.483506223 | -1.048393636 | hsa-miR-31-5p               | chr9:21512157-21512177 (-)                                                       | AGGCAAGAUGCUGGCAUAGCU     |
| 570.2968               | 1208.692                   | 0.471829713 | -1.08366182  | hsa-miR-139-5p              | chr11:72326146-72326168 (-)                                                      | UCUACAGUGCACGUGUCUCCAGU   |
| 26.45185               | 67.11097                   | 0.394150912 | -1.343179984 | hsa-miR-139-3p              | chr11:72326110-72326132 (-)                                                      | UGGAGACGCGGCCCUUGUGAGU    |
| 11.94795               | 42.72344                   | 0.279657958 | -1.838264709 | hsa-miR-187-3p              | chr18:33484798-33484819 (-)                                                      | UCGUGUCUUGUGUUGCAGCCGG    |
| 1246.263               | 2705.317                   | 0.460671707 | -1.1181891   | hsa-miR-6800-5p             | chr19:50335279-50335299 (+)                                                      | GUAGGUGACAGUCAGGGGCGG     |
| 67.27836               | 149.1604                   | 0.451047061 | -1.148650128 | hsa-miR-1202                | chr6:156267943-156267963 (+)                                                     | GUGCCACGUCGAGUGGGGGAG     |
| 2.493657               | 8.13407                    | 0.306569405 | -1.705714369 | hsa-miR-448                 | chrX:114058087-114058108 (+)                                                     | UUGCAUAGUAGGAGUCCCAU      |
| 10.12342               | 23.70608                   | 0.427038971 | -1.227560362 | hsa-miR-431-3p              | chr14:101347406-101347427 (+)                                                    | CAGGUCUCUUGCAGGGCUUCU     |
| 8.517908               | 26.08374                   | 0.326560072 | -1.614579691 | hsa-miR-490-5p              | chr7:136587952-136587971 (+)                                                     | CCAUGGAUCUCCAGGUGGGU      |
| 10.15396               | 24.54206                   | 0.41373707  | -1.273213868 | hsa-miR-758-5p              | chr14:101492371-101492392 (+)                                                    | GAUGGUUACCAGAGCACAC       |
| 6.563102               | 24.71136                   | 0.265590481 | -1.912724652 | hsa-miR-936                 | chr10:105807909-105807930 (-)                                                    | ACAGUAGAGGGAGGAUUCGAG     |
| 217.7099               | 486.0221                   | 0.447942388 | -1.158614903 | hsa-miR-383-5p              | chr8:14710992-14711013 (-)                                                       | AGAUCAGAAGGUGAUUGUGCU     |
| 1427.934               | 3199.78                    | 0.446260055 | -1.164043418 | hsa-miR-124-3p              | chr20:61809904-61809923 (+) // chr8:9760911-9760930 (-) // chr8:65291767-6529178 | UAAGGCACGCGGUAUUGCC       |
| 14.89144               | 45.15194                   | 0.329807313 | -1.600304707 | hsa-miR-1285-3p             | chr2:70480065-70480086 (-) // chr7:91833341-91833362 (-)                         | UCUGGGCAACAAGUGAGACCU     |
| 63.15896               | 149.1332                   | 0.423507039 | -1.239542145 | hsa-miR-1912                | chrX:113886064-113886085 (+)                                                     | UACCCAGAGCAUGCAGUGUGAA    |
| 23.10405               | 61.653                     | 0.374743321 | -1.416025328 | hsa-miR-1972                | chr16:15104186-15104207 (-) // chr16:70064296-70064317 (+)                       | UCAGGCCAGGCAGUGGCUCA      |
| 23.77014               | 51.27015                   | 0.463625326 | -1.108968718 | hsa-miR-2276-3p             | chr13:24736608-24736629 (+)                                                      | UCUGCAAGUGUCAGGGCGAGG     |
| 4.193446               | 9.672431                   | 0.433546231 | -1.205742254 | hsa-miR-3127-5p             | chr2:97464025-97464047 (+)                                                       | AUCAGGGCUUGUGAAUGGGAAG    |
| 3.200103               | 6.885526                   | 0.464757957 | -1.105448528 | hsa-miR-3157-5p             | chr10:97824126-97824147 (-)                                                      | UUCAGCCAGGCUAGUCAGUCU     |
| 7.050548               | 19.3974                    | 0.363479023 | -1.460055989 | hsa-miR-3065-5p             | chr17:79099686-79099708 (+)                                                      | UCAACAAAUCACUGAUGCUGGA    |
| 651.9526               | 1549.789                   | 0.420671846 | -1.249232827 | hsa-miR-1207-5p             | chr8:129061405-129061425 (+)                                                     | UGGCAGGAGGCUUGGAGGGG      |
| 13.55906               | 37.30355                   | 0.363479079 | -1.460055766 | hsa-miR-1273d               | chr1:10287785-10287809 (+)                                                       | GAACCAUGAGGUGAGGCUAGUCAGU |
| 3.161259               | 21.94248                   | 0.144070269 | -2.795155448 | hsa-miR-3613-5p             | chr13:50570601-50570622 (-)                                                      | UGUUGUACUUUUUUUUUGUUC     |
| 326.4088               | 780.5117                   | 0.418198472 | -1.257740306 | hsa-miR-4417                | chr1:5624142-5624159 (+)                                                         | GGUGGGCUUCCCGGAGGG        |
| 3.628775               | 7.878541                   | 0.460589721 | -1.118445881 | hsa-miR-4638-5p             | chr5:180649612-180649632 (-)                                                     | ACUCGGCUCGGUGGACAAGU      |
| 4.930579               | 15.26289                   | 0.323043604 | -1.630199182 | hsa-miR-5585-3p             | chr1:32552587-32552608 (+)                                                       | CUGAAUAGCUGGGACUACAGGU    |
| 23.77014               | 64.77013                   | 0.366992316 | -1.446178239 | hsa-miR-6754-5p             | chr11:71184554-71184575 (+)                                                      | CCAGGGAGGCUUGUUUGGAGGA    |
| 99.22543               | 258.2499                   | 0.38422253  | -1.379985976 | hsa-miR-3195                | chr20:60639868-60639884 (+)                                                      | CGCGCCGGCCCGGGUU          |
| 19.01959               | 38.38282                   | 0.495523518 | -1.012974564 | hsa-miR-6780b-5p            | chr6:43402285-43402307 (+)                                                       | UGGGGAAGGCUUGGCAGGGAAGA   |
| 6.721282               | 19.66167                   | 0.341846954 | -1.548577525 | hsa-miR-7151-3p             | chr10:69163109-69163129 (-)                                                      | CUACAGGCUUGAAUGGGCUCA     |
| 29.90039               | 72.75297                   | 0.410985146 | -1.282841842 | hsa-miR-1273h-5p            | chr16:24214469-24214489 (+)                                                      | CUGGGAGGUCAAGGCUAGUCAGU   |
| 9.113739               | 20.16938                   | 0.451860146 | -1.146051776 | hsa-miR-6516-5p             | chr17:75085510-75085531 (+)                                                      | UUUGCAGUAACAGGUGGAGCA     |
| 8.183274               | 23.62799                   | 0.346338135 | -1.529746843 | hsa-miR-7851-3p             | chr12:42717542-42717563 (-)                                                      | UACCUGGAGACUGAGGUUGGA     |
| 32.65362               | 66.59151                   | 0.490357104 | -1.028095316 | hsa-miR-8063                | chr15:37265032-37265053 (-)                                                      | UCAAAAUCAGGAGUCGGGGCUU    |
| 9.580845               | 21.8831                    | 0.437819367 | -1.19159232  | hsa-miR-8064                | chr3:52880539-52880558 (-)                                                       | AGCACACUGAGCGAGCGGAC      |
